# Supplementary material
Source: MDPI journal article supplement (https://www.mdpi.com/2073-4395/14/4/642)
Supplement: s1 [file s1]

**Table S1.** Details of native isolates of entomopathogenic fungal isolates obtained from soil samples and insect cadavers in Pakistan.

| Fungal group                     | Code  | Host/Substrate                       | Location            |
|----------------------------------|-------|--------------------------------------|---------------------|
| <i>Metarhizium anisopliae</i>    | WG-08 | <i>Sitophilus oryzae</i> (L.)        | Lodhran, Punjab     |
| <i>Metarhizium anisopliae</i>    | WG-09 | <i>Tribolium castaneum</i> (Herbst)  | Basti Maluk, Punjab |
| <i>Beauveria bassiana</i>        | WG-14 | Soil                                 | Sheikhupura, Punjab |
| <i>Beauveria bassiana</i>        | WG-21 | Soil                                 | Lahore, Punjab      |
| <i>Beauveria bassiana</i>        | WG-22 | <i>Tribolium castaneum</i> (Herbst)  | Gujranwala, Punjab  |
| <i>Beauveria bassiana</i>        | WG-23 | <i>Tribolium castaneum</i> (Herbst)  | Bhakhar, Punjab     |
| <i>Beauveria bassiana</i>        | WG-24 | Soil                                 | Jhelum, Punjab      |
| <i>Beauveria bassiana</i>        | WG-25 | <i>Tribolium castaneum</i> (Herbst)  | Rawalpindi, Punjab  |
| <i>Beauveria brongniartii</i>    | WG-26 | Soil                                 | Islamabad, Federal  |
| <i>Beauveria brongniartii</i>    | WG-27 | Soil                                 | Murree, Punjab      |
| <i>Purpureocillium lilacinum</i> | WG-33 | Soil                                 | Bahawalpur, Punjab  |
| <i>Purpureocillium lilacinum</i> | WG-34 | <i>Callosobruchus maculatus</i> (F.) | Faisalabad, Punjab  |
| <i>Purpureocillium lilacinum</i> | WG-35 | Soil                                 | Multan, Punjab      |
| <i>Purpureocillium lilacinum</i> | WG-36 | Soil                                 | Khanewal, Punjab    |
| <i>Purpureocillium lilacinum</i> | WG-37 | <i>Tribolium castaneum</i> (Herbst)  | Shorkot, Punjab     |

**Table S2.** Factorial analysis for screening of fifteen fungal isolates of entomopathogenic fungi and mycosis in larvae and adults of *Rhynchophorus ferrugineus*.

| Source                          | df  | Mortality |        |        |        | Mycosis |        |         |        |
|---------------------------------|-----|-----------|--------|--------|--------|---------|--------|---------|--------|
|                                 |     | Larvae    |        | Adult  |        | Larvae  |        | Adult   |        |
|                                 |     | F         | P      | F      | P      | F       | P      | F       | P      |
| Fungal isolates                 | 14  | 211.91    | < 0.01 | 88.51  | < 0.01 | 357.45  | < 0.01 | 440.69  | < 0.01 |
| Concentration                   | 1   | 828.77    | < 0.01 | 742.15 | < 0.01 | 949.53  | < 0.01 | 1777.49 | < 0.01 |
| Fungal isolates × concentration | 14  | 14.68     | < 0.01 | 5.54   | < 0.01 | 5.57    | < 0.01 | 32.56   | < 0.01 |
| Total                           | 179 |           |        |        |        |         |        |         |        |

**Table S3.** Factorial analysis for virulence of five selected isolates of entomopathogenic fungi against larvae and adults of *Rhynchophorus ferrugineus*.

| Source                                     | df  | Larvae  |        | Adults  |        |
|--------------------------------------------|-----|---------|--------|---------|--------|
|                                            |     | F       | P      | F       | P      |
| Fungal isolates                            | 4   | 507.40  | < 0.01 | 623.73  | < 0.01 |
| Concentration                              | 3   | 3705.51 | < 0.01 | 3044.29 | < 0.01 |
| Interval                                   | 2   | 6088.06 | < 0.01 | 4318.80 | < 0.01 |
| Fungal isolates × concentration            | 12  | 1.76    | 0.05   | 5.49    | < 0.01 |
| Fungal isolates × interval                 | 8   | 2.66    | < 0.01 | 18.83   | < 0.01 |
| Concentration × interval                   | 6   | 62.32   | < 0.01 | 47.40   | < 0.01 |
| Fungal isolates × concentration × interval | 24  | 7.93    | < 0.01 | 2.55    | < 0.01 |
| Total                                      | 539 |         |        |         |        |
